# Supplementary material for: Antioxidants Profiling of By-Products from Eucalyptus Greenboards Manufacture
Source: PubMed Central journal article supplement (PMC6719899; doi:10.3390/antiox8080263), 2019-08-01
Supplement: antioxidants-08-00263-s001.pdf [file antioxidants-08-00263-s001.pdf]

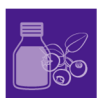

# Antioxidants profiling of by-products from Eucalyptus greenboards manufacture

Maria Celeiro<sup>1\*</sup>, J.Pablo Lamas<sup>1</sup>, Rosa Arcas<sup>2</sup>, Marta Lores<sup>1</sup>

<sup>1</sup> Laboratory of Research and Development of Analytical Solutions (LIDSA), Department of Analytical Chemistry, Nutrition and Food Science. Faculty of Chemistry. E-15782, Campus Vida, Universidade de Santiago de Compostela, Spain; maria.celeiro.monterol@usc.es; juanpablo.lamas@usc.es; marta.lores@usc.es

<sup>2</sup> Betanzos HB, Betanzos, E-15300, A Coruña, Spain; rarcas@betanzoshb.es

\* Correspondence: maria.celeiro.montero@usc.es; Tel.: +34-881-814-461 (M.C)

**Table S1.** Linear range, coefficients of determination ( $R^2$ ), retention time and MS/MS transitions for the identified polyphenols in the concentrate of Eucalyptus organic extracts.

| Polyphenols               | CAS      | Linear range<br>(mg L <sup>-1</sup> ) | R <sup>2</sup> | Retention<br>time (min) | MS/MS transitions<br>(Collision energy, eV)                                |
|---------------------------|----------|---------------------------------------|----------------|-------------------------|----------------------------------------------------------------------------|
| Gallic acid               | 149-91-7 | 0.1-10                                | 0.9965         | 2.03                    | <u>169.02 → 125.04 (17)</u><br>169.02 → 153.1 (15)                         |
| Protocatechuic acid       | 99-50-3  | 0.1-10                                | 0.9975         | 3.30                    | <u>152.98 → 109.04 (17)</u><br>152.98 → 91.04 (28)<br>152.98 → 108.03 (26) |
| 3,4-dihydroxybenzaldehyde | 139-85-5 | 0.1-10                                | 0.9982         | 4.47                    | <u>137.07 → 136.11 (21)</u><br>137.07 → 91.09 (24)<br>137.07 → 92.13 (25)  |
| Chlorogenic acid          | 327-97-9 | 0.1-10                                | 0.9956         | 5.41                    | <u>353.00 → 191.07 (22)</u><br>353.00 → 85.09 (43)<br>353.00 → 93.07 (45)  |
| 4-hydroxybenzaldehyde     | 123-08-0 | 0.1-10                                | 0.9952         | 5.64                    | <u>122.97 → 95.04 (13)</u><br>122.97 → 51.1 (36)<br>122.97 → 77.96 (20)    |

Underlined values: Quantification MS/MS transitions
